# Supplementary material
Source: Springer Nature journal article supplement (https://www.springerprofessional.de/resource/supplementary/13677_2012_9_MOESM6_ESM.pdf/10743424)

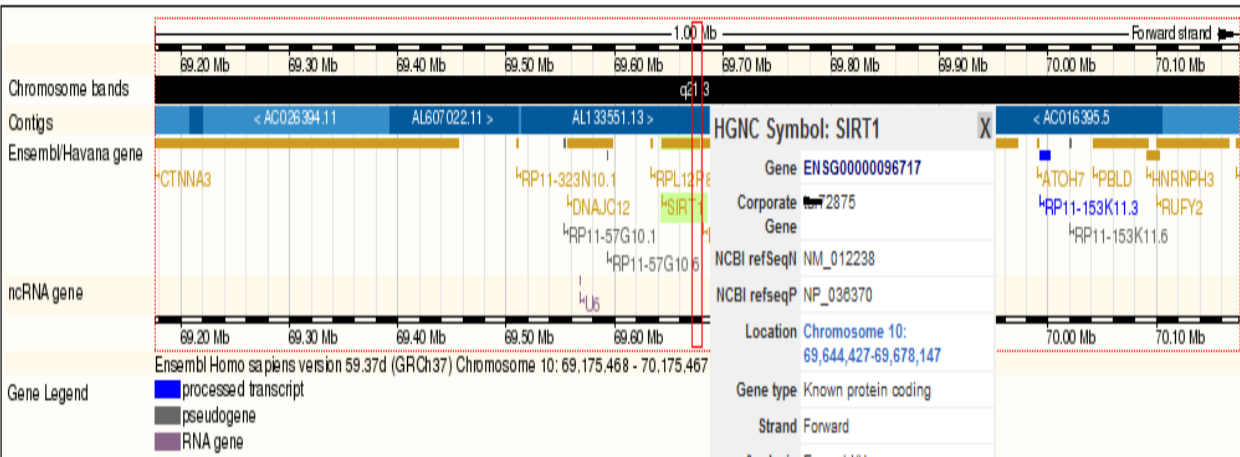

Location:  :  -

Gene containing both Ensembl genebuild transcripts and [Havana](#) manual curation, see [article](#).

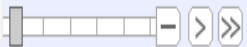

Supplement: MOESM6 [file 10743424]
